# Supplementary material
Source: publisher figshare collection journal article supplement (https://acs.figshare.com/ndownloader/files/24697802)
Supplement: Supplementary file 1 [file 24697802]

## Supporting Information

# **Incorporation of cesium lead halide perovskite into g-C<sub>3</sub>N<sub>4</sub> for photocatalytic CO<sub>2</sub> reduction**

Ruolin Cheng<sup>1</sup>, Handong Jin<sup>1</sup>, Maarten B. J. Roeffaers<sup>2</sup>, Johan Hofkens<sup>1,3\*</sup>, Elke Debroye<sup>1\*</sup>

1 Department of Chemistry, Faculty of Sciences, KU Leuven, Celestijnenlaan 200F, 3001 Leuven, Belgium

2 Centre for membrane separations, adsorption, catalysis and spectroscopy for sustainable solutions (cMACS), KU Leuven, Celestijnenlaan 200F, 3001 Leuven, Belgium

3 Max Planck Institute for Polymer Research, Ackermannweg 10, 55128 Mainz, Germany

Correspondence to:

\* E-mail for J.H.: [johan.hofkens@kuleuven.be](mailto:johan.hofkens@kuleuven.be)

\* E-mail for E.D.: [elke.debroye@kuleuven.be](mailto:elke.debroye@kuleuven.be)

## Supplementary Figures and Tables

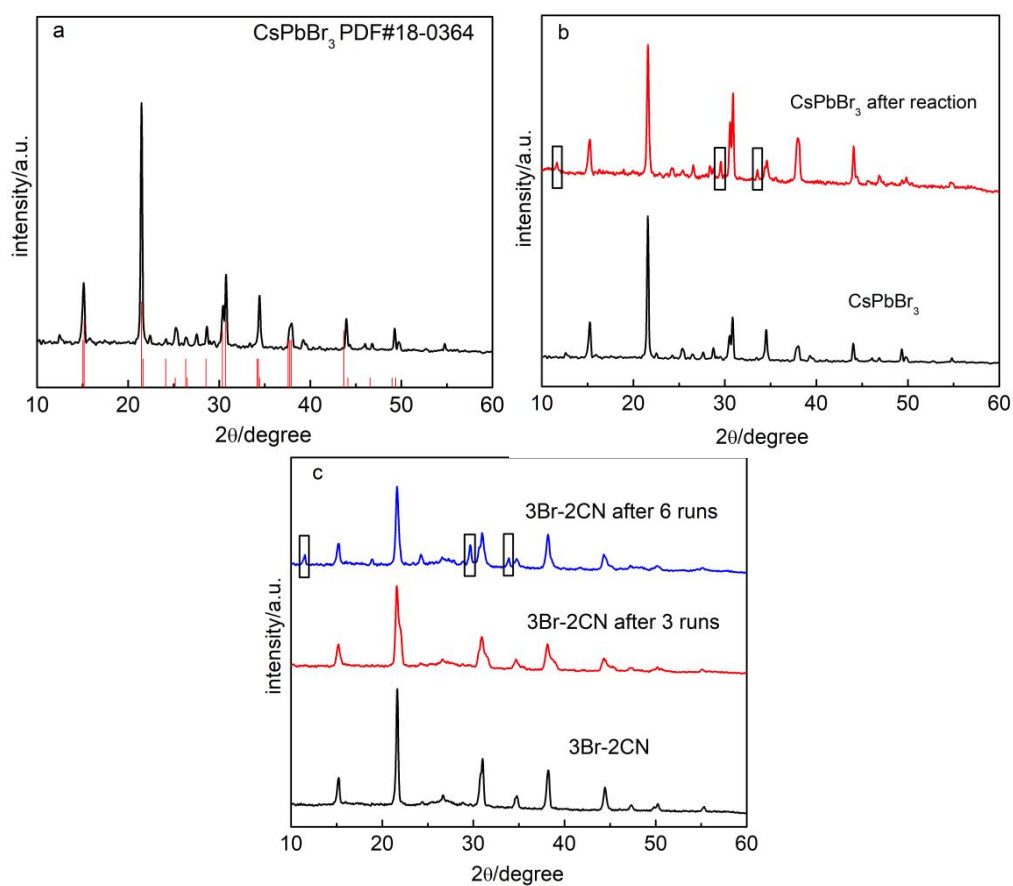

**Figure S1.** XRD pattern of (a) pure  $\text{CsPbBr}_3$ , (b)  $\text{CsPbBr}_3$  before and after a 4 hours photocatalytic reaction, and (c) 3Br-2CN before and after three and six runs of photocatalytic reaction.

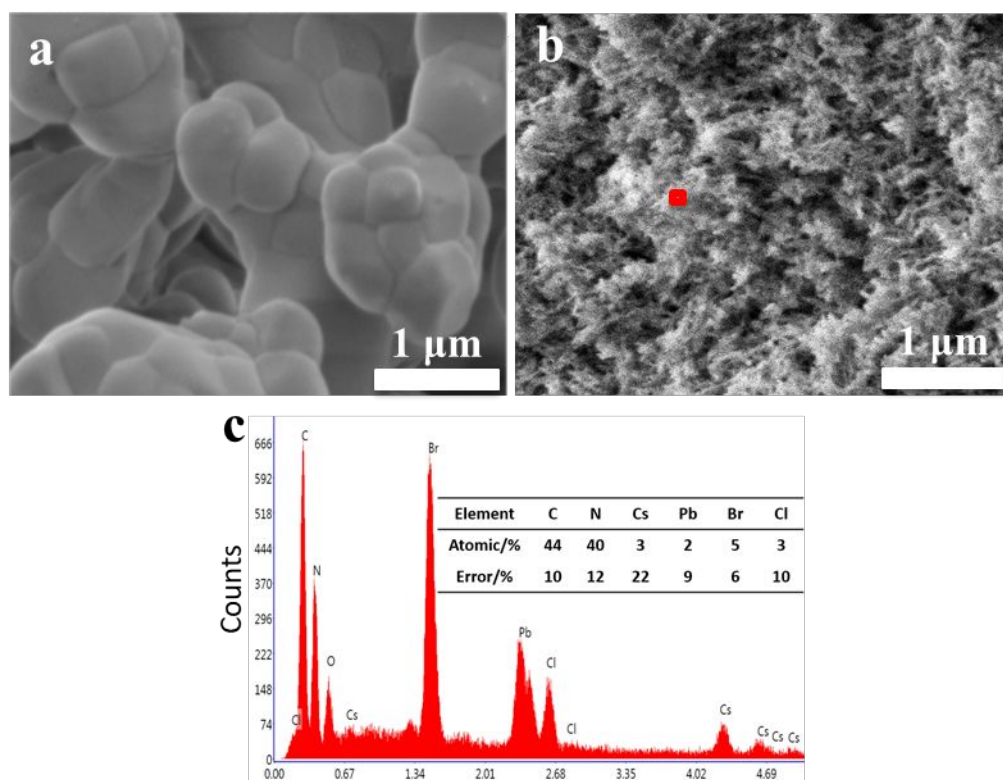

**Figure S2.** Typical SEM images of (a) CsPbBr<sub>3</sub>, (b) 3Br-2CN after 4 hours photocatalytic reaction and (c) corresponding EDS result of the selected region in (b).

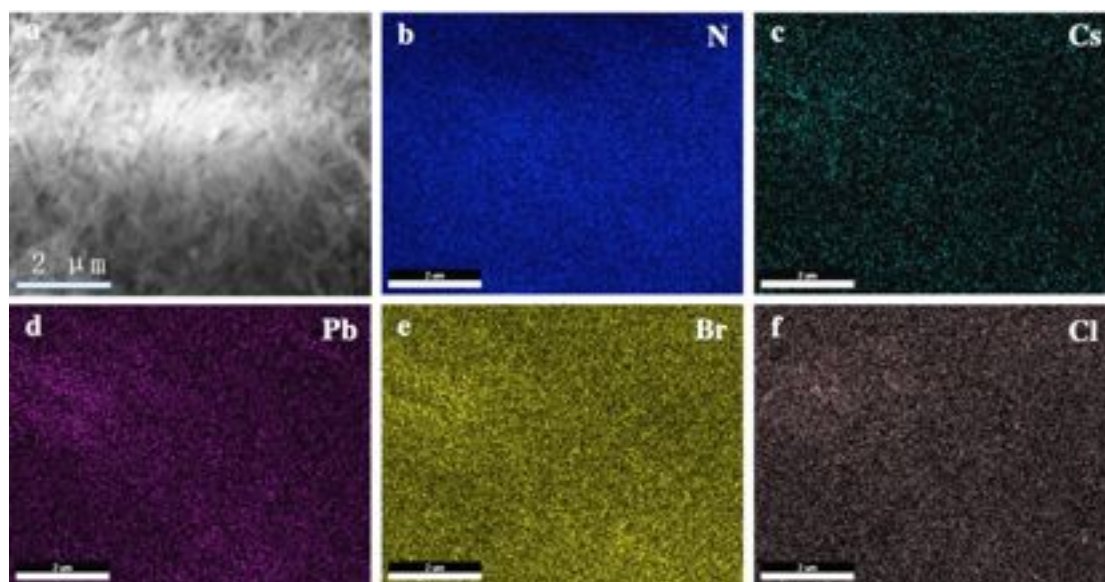

**Figure S3.** SEM image (a) and the corresponding element mappings (b-f) of 3Br-2CN.

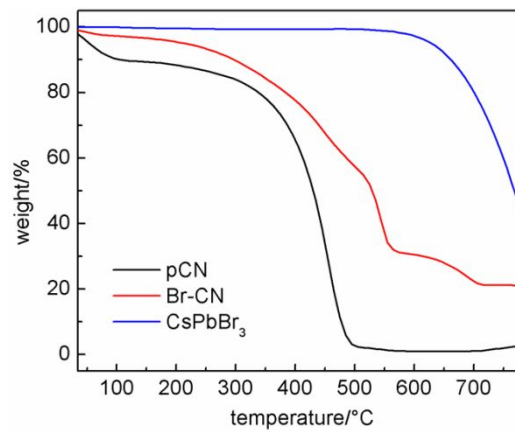

**Figure S4.** TGA thermograms for pure CsPbBr<sub>3</sub>, pCN and the composite Br-CN.

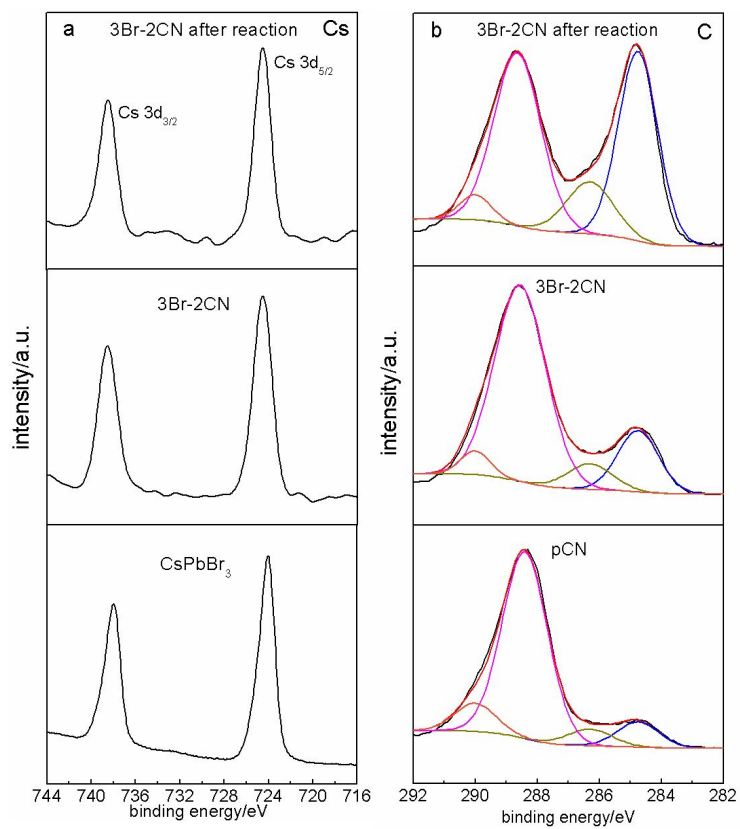

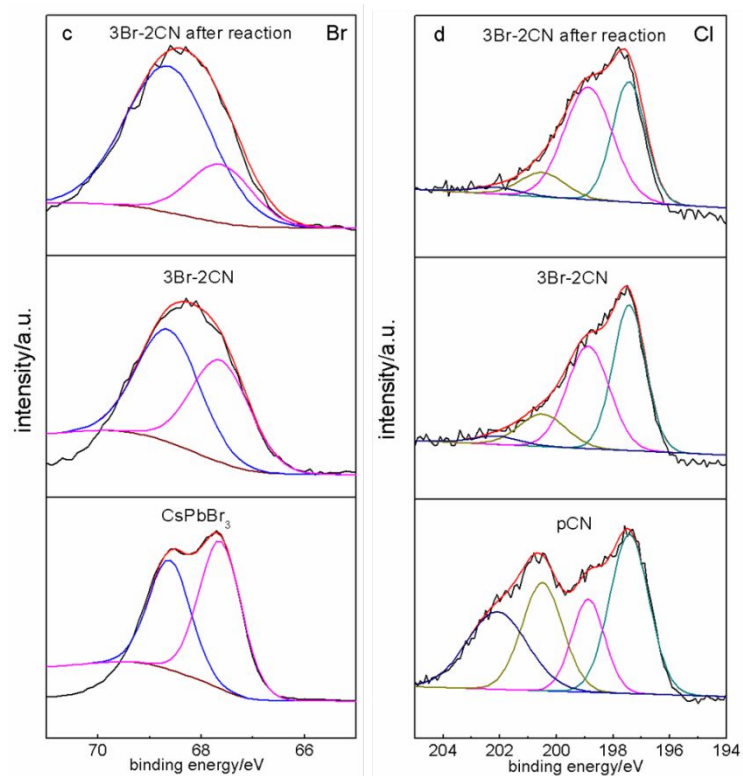

**Figure S5.** XPS spectra of CsPbBr<sub>3</sub> and 3Br-2CN: (a) Cs 3d, (b) Cl 2s, (c) Br 3d and (d) Cl 2p.

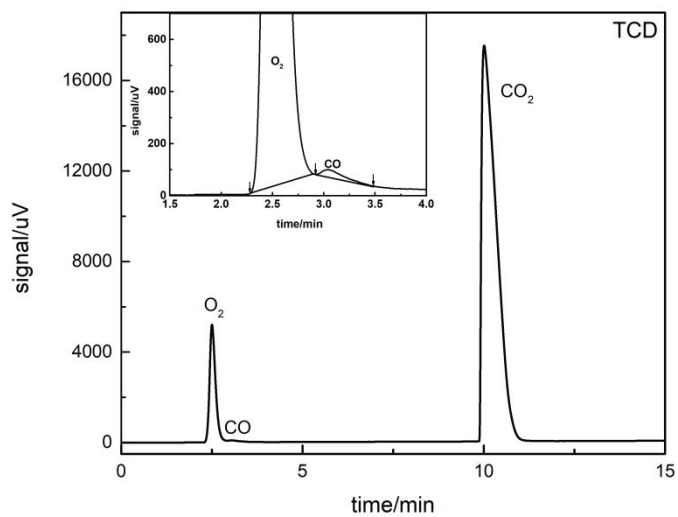

**Figure S6.** A typical GC chromatogram of the 3Br-2CN composite.

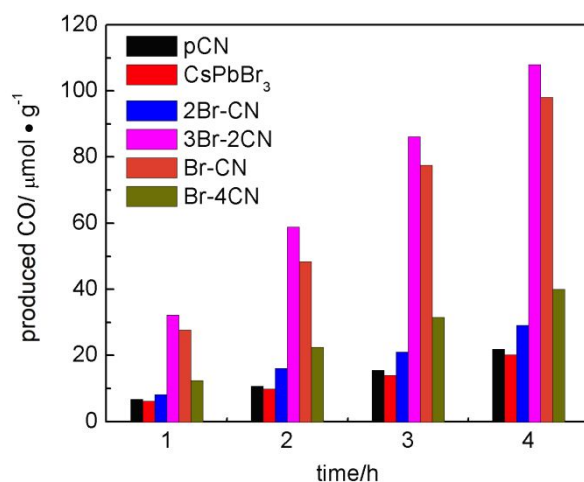

**Figure S7.** Time-dependent CO generation over synthesized pCN, CsPbBr<sub>3</sub> and CsPbX<sub>3</sub>/g-C<sub>3</sub>N<sub>4</sub> catalysts.

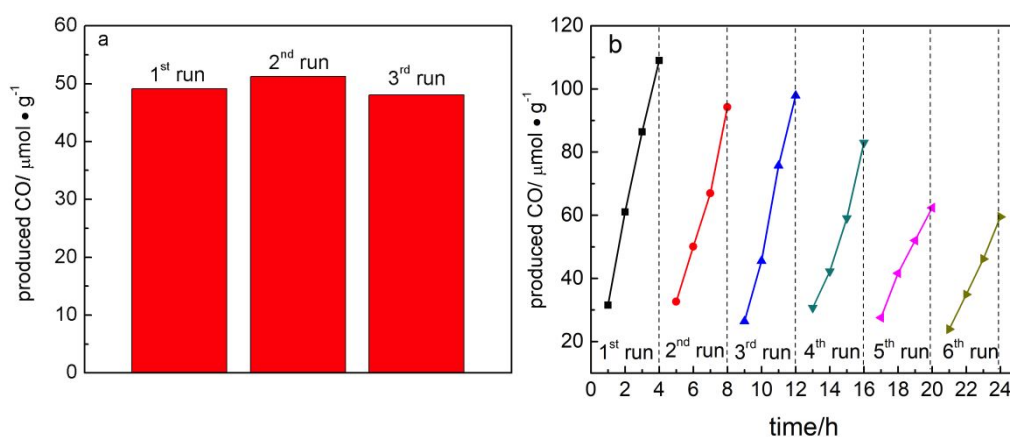

**Figure S8.** Stability test of CO<sub>2</sub> photoreduction on 3Br-2CN (a) in an acetonitrile/water solution for three consecutive runs of 2 hours each; (b) six consecutive runs of recycling photocatalytic tests for 24 hours.

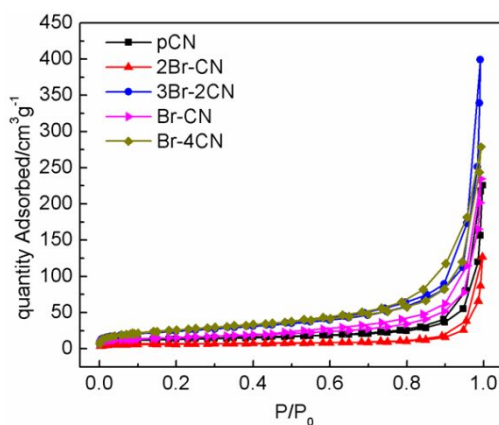

**Figure S9.** N<sub>2</sub> adsorption-desorption isotherms of pCN and all CsPbX<sub>3</sub>/g-C<sub>3</sub>N<sub>4</sub> composites.

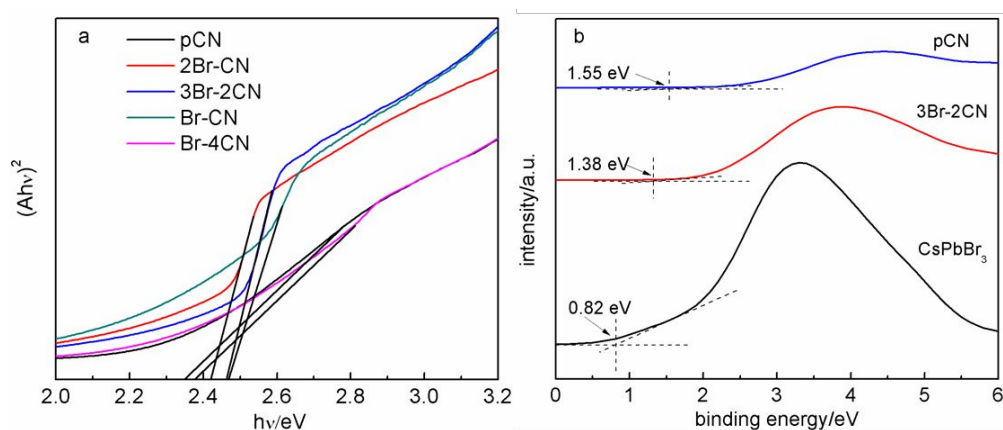

**Figure S10.** (a) Tauc plots of pCN and CsPbX<sub>3</sub>/g-C<sub>3</sub>N<sub>4</sub> samples. The band gap energies of the photocatalysts, listed in Table 1, were estimated by Kubelka-Munk transformation. Each bandgap is determined by the intersection point of the corresponding dashed tangent line and the horizontal axis; (b) Valence band XPS spectra of pCN, CsPbBr<sub>3</sub> and 3Br-2CN.
